# Supplementary material for: Effects of Inorganic Salt Solutions on Vigour, Viability, Oxidative Metabolism and Germination Enzymes in Aged Cabbage and Lettuce Seeds
Source: PubMed Central journal article supplement (PMC7569860; doi:10.3390/plants9091164), 2020-09-09
Supplement: plants-09-01164-s001.pdf [file plants-09-01164-s001.pdf]

## Supplementary data

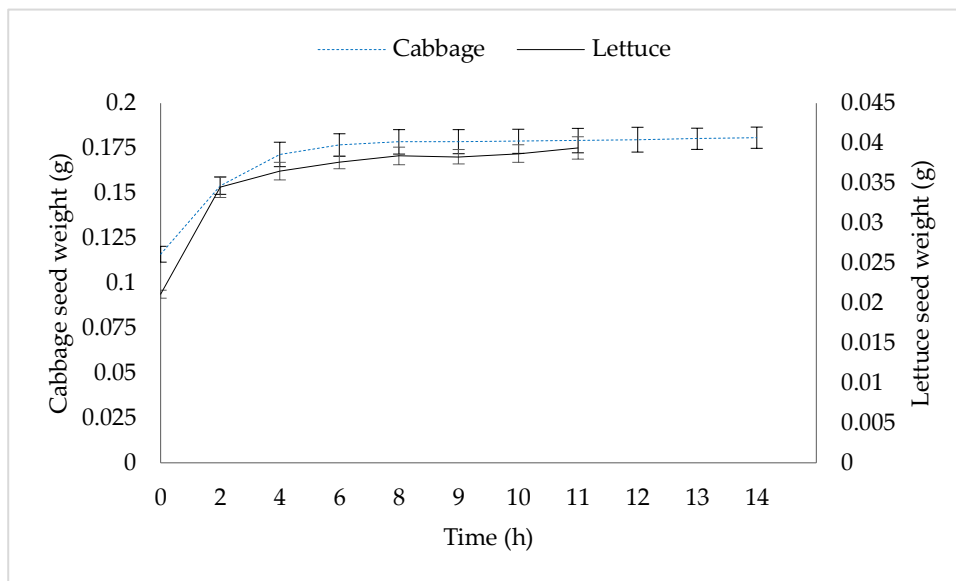

**Figure S1.** Water uptake in cabbage and lettuce seeds. Data points represent mean $\pm$ SD (3 experiments of n = 25 seeds for each trial).

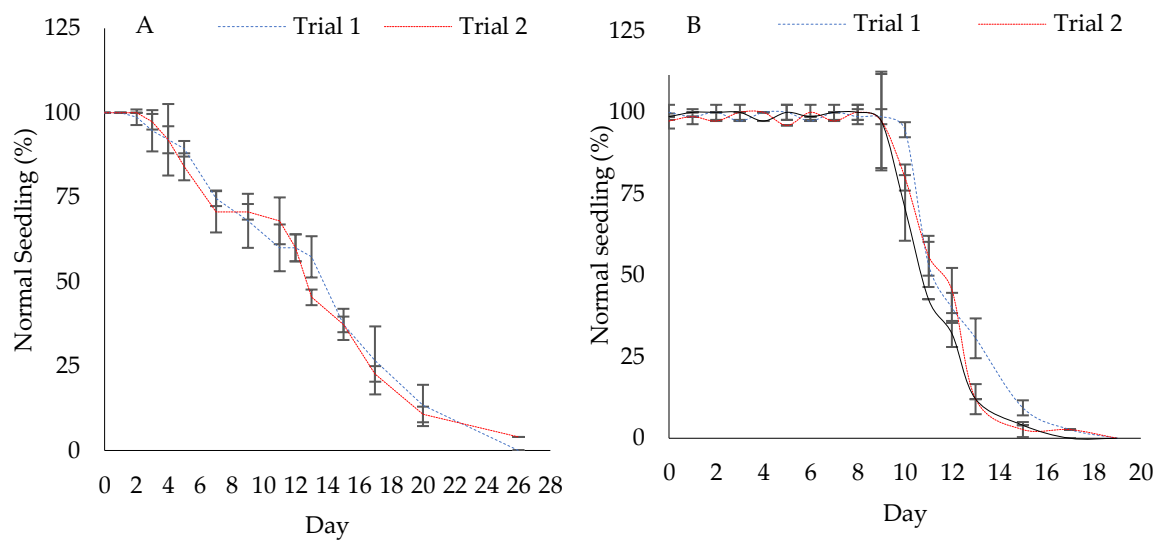

**Figure S2.** Normal seedling production (%) after controlled deterioration of cabbage (A) and lettuce (B) seeds 14 days after germination. Data points represent mean $\pm$ SD (4 experiments of n = 25 seeds for each trial).

**Table S1.** Effect of the application of inorganic salt solutions on seedling vigour index of fresh and controlled deteriorated (P75) cabbage and lettuce seeds.

| Controlled deterioration Level | Treatments           | Seedling Vigour Index         |                               |
|--------------------------------|----------------------|-------------------------------|-------------------------------|
|                                |                      | Cabbage                       | Lettuce                       |
| Fresh                          | DW                   | 6721.20±946.96 <sup>NS</sup>  | 3446.30±530.44 <sup>NS</sup>  |
|                                | CaCl <sub>2</sub>    | 6820.20± 912.16 <sup>NS</sup> | 3655.00±457.42 <sup>NS</sup>  |
|                                | CaCl <sub>2</sub> CW | 6542.10±1369.35 <sup>NS</sup> | 3525.00±244.66 <sup>NS</sup>  |
|                                | CaMg                 | 6284.90±1346.14 <sup>NS</sup> | 3749.80±474.16 <sup>NS</sup>  |
|                                | CaMg CW              | 5917.50±1075.33 <sup>NS</sup> | 3462.50±289.32 <sup>NS</sup>  |
|                                | CaMg CW (6.5)        | 7173.20±1231.64 <sup>NS</sup> | 3440.50±333.14 <sup>NS</sup>  |
|                                | MgCl <sub>2</sub>    | 7004.70±888.17 <sup>NS</sup>  | 3647.00±414.42 <sup>NS</sup>  |
|                                | MgCl <sub>2</sub> CW | 6752.80±765.97 <sup>NS</sup>  | 3404.50±340.25 <sup>NS</sup>  |
|                                | NaCl                 | 4692.50±1904.47 <sup>NS</sup> | 3431.95±231.65 <sup>NS</sup>  |
|                                | NaCl CW              | 6906.30±841.71 <sup>NS</sup>  | 3400.00±153.44 <sup>NS</sup>  |
|                                | NaCl CW (6.5)        | 6060.50±1158.96 <sup>NS</sup> | 3463.90±482.66 <sup>NS</sup>  |
| P75                            | DW                   | 7554.50±2623.67 <sup>NS</sup> | 4191.90±842.42 <sup>NS</sup>  |
|                                | CaCl <sub>2</sub>    | 5559.45±1833.26 <sup>NS</sup> | 3560.70±7181.02 <sup>NS</sup> |
|                                | CaCl <sub>2</sub> CW | 7126.30±2643.67 <sup>NS</sup> | 4387.50±1315.91 <sup>NS</sup> |
|                                | CaMg                 | 4357.00±1044.53 <sup>NS</sup> | 4047.90±1256.79 <sup>NS</sup> |
|                                | CaMg CW              | 6512.00±1503.23 <sup>NS</sup> | 4157.10±328.56 <sup>NS</sup>  |
|                                | CaMg CW (6.5)        | 6627.20±2031.09 <sup>NS</sup> | 4512.70±673.33 <sup>NS</sup>  |
|                                | MgCl <sub>2</sub>    | 8012.50±2757.45 <sup>NS</sup> | 4918.10±831.24 <sup>NS</sup>  |
|                                | MgCl <sub>2</sub> CW | 6612.50±1427.34 <sup>NS</sup> | 3552.20±880.11 <sup>NS</sup>  |
|                                | NaCl                 | 4672.20±2007.78 <sup>NS</sup> | 4491.45±782.45 <sup>NS</sup>  |
|                                | NaCl CW              | 6359.80±1727.57 <sup>NS</sup> | 4592.30±1117.40 <sup>NS</sup> |
|                                | NaCl CW (6.5)        | 6435.00±2780.75 <sup>NS</sup> | 4390.60±882.63 <sup>NS</sup>  |

Values represent mean±SD (4 × n = 25) of inorganic salt solutions that enhanced seedling vigour index (SVI) significantly relative to DW-treated seeds in fresh and P75. Values labelled with different letters are significantly different ( $P < 0.05$ , ANOVA) when compared across hydration treatments within each CD level. Cathodic water, CW; cathodic water adjusted to pH 6.5, CW (6.5); controlled deterioration, CD; NS: not significantly different from value obtained with DW and therefore not considered in statistical comparisons.

**Table S2.** Effect of the application of inorganic salt solutions on mortality (%) in fresh and controlled deteriorated cabbage and lettuce seeds.

| Hydration treatments | Cabbage                     |                                 |                                 |                                 | Lettuce                     |                                 |                                 |                                 |
|----------------------|-----------------------------|---------------------------------|---------------------------------|---------------------------------|-----------------------------|---------------------------------|---------------------------------|---------------------------------|
|                      | % mortality for fresh seeds | % mortality for CDd (P75) seeds | % mortality for CDd (P50) seeds | % mortality for CDd (P25) seeds | % mortality for fresh seeds | % mortality for CDd (P75) seeds | % mortality for CDd (P50) seeds | % mortality for CDd (P25) seeds |
| DW                   | 11.00±9.26 <sup>NS</sup>    | 17.00±8.21 <sup>NS</sup>        | 38.50±5.63 <sup>b</sup>         | 60.00±3.02 <sup>b</sup>         | 1.00±1.85 <sup>NS</sup>     | 20.00±7.09 <sup>NS</sup>        | 38.50±11.70 <sup>a</sup>        | 70.00±5.24 <sup>a</sup>         |
| CaCl <sub>2</sub>    | 6.00±6.76 <sup>NS</sup>     | 23.50±6.57 <sup>NS</sup>        | 65.00±7.33 <sup>a</sup>         | 70.50±11.10 <sup>a</sup>        | 0.00±0.00 <sup>NS</sup>     | 23.00±5.95 <sup>NS</sup>        | 33.00±8.75 <sup>NS</sup>        | 55.00±11.66 <sup>NS</sup>       |
| CaCl <sub>2</sub> CW | 5.50±5.21 <sup>NS</sup>     | 20.00±7.09 <sup>NS</sup>        | 71.00 ±12.78 <sup>a</sup>       | 73.50±5.21 <sup>a</sup>         | 0.00±0.00 <sup>NS</sup>     | 23.00±7.63 <sup>NS</sup>        | 29.00±7.93 <sup>NS</sup>        | 54.00±11.51 <sup>NS</sup>       |
| CaMg                 | 7.50±7.54 <sup>NS</sup>     | 30.00±4.28 <sup>NS</sup>        | 51.50±6.91 <sup>NS</sup>        | 68.50±4.50 <sup>a</sup>         | 1.50±4.24 <sup>NS</sup>     | 20.50±6.57 <sup>NS</sup>        | 13.00±5.13 <sup>b</sup>         | 51.50±13.60 <sup>b</sup>        |
| CaMg CW              | 8.50±9.43 <sup>NS</sup>     | 22.50±7.98 <sup>NS</sup>        | 33.00±11.46 <sup>NS</sup>       | 72.00±3.70 <sup>a</sup>         | 0.00±0.00 <sup>NS</sup>     | 24.00±4.28 <sup>NS</sup>        | 31.50±10.13 <sup>NS</sup>       | 66.00±10.03 <sup>NS</sup>       |
| CaMg CW (6.5)        | 3.50±5.83 <sup>NS</sup>     | 23.50±7.23 <sup>NS</sup>        | 38.00±7.09 <sup>NS</sup>        | 63.50±2.56 <sup>NS</sup>        | 1.00±1.85 <sup>NS</sup>     | 20.50±3.96 <sup>NS</sup>        | 28.00±11.90 <sup>NS</sup>       | 63.00±9.74 <sup>NS</sup>        |
| MgCl <sub>2</sub>    | 5.00±7.01 <sup>NS</sup>     | 15.50±10.13 <sup>NS</sup>       | 54.50±8.80 <sup>NS</sup>        | 77.50±6.39 <sup>a</sup>         | 1.00±1.85 <sup>NS</sup>     | 13.00±7.33 <sup>NS</sup>        | 36.50±7.84 <sup>NS</sup>        | 60.00±6.41 <sup>NS</sup>        |
| MgCl <sub>2</sub> CW | 7.50±9.90 <sup>NS</sup>     | 17.50±6.74 <sup>NS</sup>        | 46.50±6.02 <sup>NS</sup>        | 64.50±9.67 <sup>NS</sup>        | 0.50±1.41 <sup>NS</sup>     | 27.50±11.80 <sup>NS</sup>       | 36.50±5.42 <sup>NS</sup>        | 50.00±11.11 <sup>b</sup>        |
| NaCl                 | 6.50±5.47 <sup>NS</sup>     | 25.00±12.42 <sup>NS</sup>       | 28.50±11.40 <sup>NS</sup>       | 70.75±3.01 <sup>a</sup>         | 1.50±1.85 <sup>NS</sup>     | 21.00±5.55 <sup>NS</sup>        | 32.00±12.28 <sup>NS</sup>       | 56.50±13.43 <sup>NS</sup>       |
| NaCl CW              | 4.50±4.99 <sup>NS</sup>     | 15.50±6.21 <sup>NS</sup>        | 57.00±13.31 <sup>a</sup>        | 65.50±4.75 <sup>NS</sup>        | 0.00±0.00 <sup>NS</sup>     | 21.00±5.95 <sup>NS</sup>        | 40.00±10.03 <sup>NS</sup>       | 49.50±10.03 <sup>b</sup>        |
| NaCl CW (6.5)        | 6.00±8.00 <sup>NS</sup>     | 22.50±7.69 <sup>NS</sup>        | 46.50±4.24 <sup>NS</sup>        | 59.00±7.33 <sup>NS</sup>        | 0.50±1.41 <sup>NS</sup>     | 21.00±5.55 <sup>NS</sup>        | 36.00±5.66 <sup>NS</sup>        | 47.00±8.75 <sup>b</sup>         |

Values represent mean±SD (4 × n = 25) % mortality of the control (fresh seeds soaked in deionised water [DW] and all the inorganic salt solutions), and CDd (P75, P50 and P25) cabbage and lettuce seeds exposed to the inorganic salt solutions. Values labelled with different letters are significantly different ( $P < 0.05$ , ANOVA) when compared across hydration treatments within each controlled deterioration level. Cathodic water, CW; cathodic water adjusted to pH 6.5, CW (6.5); controlled deteriorated, CDd; not significant, NS.

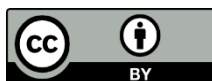

© 2020 by the authors. Submitted for possible open access publication under the terms and conditions of the Creative Commons Attribution (CC BY) license (<http://creativecommons.org/licenses/by/4.0/>).
